# Supplementary material
Source: ML conference proceedings conference paper supplement (https://openreview.net/forum?id=BOtjMacACI)
Supplement: supplementary_material [file attachment]

707 **Efficient Adaptation of Pre-trained Vision Transformer via**  
708 **Householder Transformation**  
709 **Supplementary Materials**

710 In the supplementary materials involving our work, we demonstrate Detailed dataset statistic, Hyper-  
711 parameters in our work, Experimental details, and broader impacts, including:

- 712 • **A Detailed dataset statistic**
- 713 • **B Hyper-parameters in our work**
- 714 • **C Experimental details on larger-scale and hierarchical ViT backbones**
- 715 • **D Experimental details on ablation study**
- 716 • **E Broader impacts**

717 Due to the limitation that supplementary materials larger than 100MB cannot be uploaded to the Open-  
718 Review website, only the project code as the concise supplementary materials is uploaded to this web-  
719 site. Please refer to the anonymous link [https://drive.google.com/file/d/18sXhtqM1KZd4\\_](https://drive.google.com/file/d/18sXhtqM1KZd4_LRIck2NvSlKiFiHrG2d/view?to obtain the complete code, datasets, and models.)  
720 [LRICK2NvSlKiFiHrG2d/view?](https://drive.google.com/file/d/18sXhtqM1KZd4_LRIck2NvSlKiFiHrG2d/view?to obtain the complete code, datasets, and models.)to obtain the complete code, datasets, and models.

## A Detailed dataset statistic

We provide detailed information about the datasets used in this paper, including the number of classes and the sizes of the training, validation, and test sets, in Table 1 (FGVC) and Table 2 (VTAB-1k). The FGVC datasets include CUB-200-2011, NABirds, Oxford Flowers, Stanford Dogs, and Stanford Cars, which are used for fine-grained classification tasks of birds, flowers, dogs, and cars, respectively. The VTAB-1k datasets cover natural, specialized, and structured tasks, including natural image datasets such as CIFAR-100, Caltech101, DTD, Flowers102, Pets, SVHN, and Sun397; specialized image datasets such as Patch Camelyon, EuroSAT, Resisc45, and Retinopathy; and structured image datasets such as Clevr/count, Clevr/distance, DMLab, KITTI/distance, dSprites/location, dSprites/orientation, SmallNORB/azimuth, and SmallNORB/elevation. Detailed information about these datasets is presented in the tables.

Table 1: Dataset statistics for FGVC. “\*” denotes the train/val split of datasets following the dataset setting in VPT [21].

| Dataset             | Description                             | Classes | Train size | Val size | Test size |
|---------------------|-----------------------------------------|---------|------------|----------|-----------|
| CUB-200-2011 [34]   | Fine-grained bird species recognition   | 200     | 5,394*     | 600*     | 5,794     |
| NABirds [35]        | Fine-grained bird species recognition   | 555     | 21,536*    | 2,393*   | 24,633    |
| Oxford Flowers [36] | Fine-grained flower species recognition | 102     | 1,020      | 1,020    | 6,149     |
| Stanford Dogs [37]  | Fine-grained dog species recognition    | 120     | 10,800*    | 1,200*   | 8,580     |
| Stanford Cars [38]  | Fine-grained car classificatio          | 196     | 7,329*     | 815*     | 8,041     |

## B Hyper-parameters in our work

Table 3 provides a summary of the configurations used in our experiments. As discussed in Section 4, we performed a grid search on the validation set of each task to determine the optimal hyperparameters, including learning rate, weight decay, batch size, and dropout rate.

## C Experimental details on larger-scale and hierarchical ViT backbones

Table 4 and 5 respectively display the comprehensive results of the comparison conducted in Section 4 among ViT-Large and Swin-Base models.

## D Experimental details on ablation study

We provide further explanation of the ablation experiments in Section 4. In the study on the transferability of HTA, we replaced the low-rank adaptation matrices in LoRA, we used an HTA module to replace the bottleneck part of LoRA, while in Adapter, we directly replaced the Adapter with an HTA module. The detailed experimental results are presented in the table 6. In the study of the low-rank adaptation part of HTA, we set its dimensions to 0, 1, 2, and 4, respectively. The results are shown in Table 7.

## E Broader impacts

**Practicality:** Our approach differs from traditional methods by employing Householder transformations rather than standard unitary matrices, which can be efficiently derived. This approach boosts the efficiency of parameter usage and significantly cuts down on the number of parameters requiring fine-tuning. With this technique, we manage to achieve high performance while optimizing parameter use. Leveraging large-scale pre-trained models, our HTA method proves to be both highly efficient and practical across diverse applications.

**Low Energy Consumption:** Our approach enhances the model’s computational efficiency by decreasing the necessary computational parameters, thus reducing energy usage during training. This reduction aids in conserving energy and lowering emissions, aligning with global sustainability goals and the push for eco-friendly practices. Moreover, our method not only improves the model’s

Table 2: Dataset statistics for VTAB-1k [39].

| Dataset              | Description | Classes | Train size | Val size | Test size |
|----------------------|-------------|---------|------------|----------|-----------|
| CIFAR-100            | Natural     | 100     | 800/1,000  | 200      | 10,000    |
| Caltech101           |             | 102     |            |          | 6,084     |
| DTD                  |             | 47      |            |          | 1,880     |
| Flowers102           |             | 102     |            |          | 6,149     |
| Pets                 |             | 37      |            |          | 3,669     |
| SVHN                 |             | 10      |            |          | 26,032    |
| Sun397               |             | 397     |            |          | 21,750    |
| Patch Camelyon       | Specialized | 2       | 800/1,000  | 200      | 32,768    |
| EuroSAT              |             | 10      |            |          | 5,400     |
| Resisc45             |             | 45      |            |          | 6,300     |
| Retinopathy          |             | 5       |            |          | 42,670    |
| Clevr/count          | Structured  | 8       | 800/1,000  | 200      | 15,000    |
| Clevr/distance       |             | 6       |            |          | 15,000    |
| DMLab                |             | 6       |            |          | 22,735    |
| KITTI/distance       |             | 4       |            |          | 711       |
| dSprites/location    |             | 16      |            |          | 73,728    |
| dSprites/orientation |             | 16      |            |          | 73,728    |
| SmallNORB/azimuth    |             | 18      |            |          | 12,150    |
| SmallNORB/elevation  |             | 9       |            |          | 12,150    |

Table 3: The implementation details of configurations such as optimizer and hyper-parameters. We select the best hyper-parameters for each download task via using grid search.

|                        |                                              |
|------------------------|----------------------------------------------|
| Optimizer              | AdamW                                        |
| Learning Rate          | {0.2, 0.1, 0.05, 0.01, 0.005, 0.001, 0.0001} |
| Weight Decay           | {0.05, 0.01, 0.005, 0.001, 0}                |
| Batch Size             | {64, 32, 16}                                 |
| Adapter Dropout        | {0.5, 0.3, 0.2, 0.1, 0}                      |
| Learning Rate Schedule | Cosine Decay                                 |
| Training Epochs        | 100                                          |
| Warmup Epochs          | 10                                           |

Table 4: This table is extended from Table 3 in Section 4 and describes the detailed experimental results of the performance comparison on VTAB-1k using ViT-Large pre-trained on ImageNet-21k as the backbone.

| Methods          | Datasets  |            | Natural |            |      |      |        |      |          |         |          |             | Specialized |             |            |       |            |           |           |            |           |      | Structed |       |  |  |  |  |  |  |  |  | Mean Total | Params.(M) |
|------------------|-----------|------------|---------|------------|------|------|--------|------|----------|---------|----------|-------------|-------------|-------------|------------|-------|------------|-----------|-----------|------------|-----------|------|----------|-------|--|--|--|--|--|--|--|--|------------|------------|
|                  | CIFAR-100 | Caltech101 | DTD     | Flowers102 | Pets | SVNH | Sun397 | Mean | Camelyon | EuroSAT | Resisc45 | Retinopathy | Mean        | Clevr-Count | Clevr-Dist | DMLab | KITTI-Dist | dSpre-Loc | dSpre-Ori | sNORB-Azim | sNORB-Ele | Mean |          |       |  |  |  |  |  |  |  |  |            |            |
| Full fine-tuning | 68.6      | 84.3       | 58.6    | 96.3       | 86.5 | 87.5 | 41.4   | 74.7 | 82.6     | 95.9    | 82.4     | 74.2        | 83.8        | 55.4        | 55.0       | 42.2  | 74.2       | 56.8      | 43.0      | 28.5       | 29.7      | 48.1 | 65.4     | 303.4 |  |  |  |  |  |  |  |  |            |            |
| Linear probing   | 72.2      | 86.4       | 63.6    | 97.4       | 85.8 | 38.1 | 52.5   | 70.9 | 76.9     | 87.3    | 66.6     | 45.4        | 69.1        | 28.2        | 28.0       | 34.7  | 54.0       | 10.6      | 14.2      | 14.6       | 21.9      | 25.8 | 51.5     | 0.05  |  |  |  |  |  |  |  |  |            |            |
| Adapter [19]     | 75.3      | 84.2       | 54.5    | 97.4       | 84.3 | 31.3 | 52.9   | 68.6 | 75.8     | 85.1    | 63.4     | 69.5        | 73.5        | 35.4        | 34.1       | 30.8  | 47.1       | 30.4      | 23.4      | 10.8       | 19.8      | 29.0 | 52.9     | 2.38  |  |  |  |  |  |  |  |  |            |            |
| Bias [20]        | 71.0      | 82.4       | 51.3    | 96.3       | 83.2 | 59.5 | 49.9   | 70.5 | 72.9     | 87.9    | 63.1     | 71.3        | 73.8        | 51.2        | 50.7       | 33.5  | 54.8       | 65.9      | 37.3      | 13.7       | 22.2      | 41.2 | 58.9     | 0.32  |  |  |  |  |  |  |  |  |            |            |
| VPT-Shallow [21] | 80.6      | 88.2       | 67.1    | 98.0       | 85.9 | 78.4 | 53.0   | 78.7 | 79.7     | 93.5    | 73.4     | 73.1        | 79.9        | 41.5        | 52.5       | 32.3  | 64.2       | 48.3      | 35.3      | 21.6       | 28.8      | 40.6 | 62.9     | 0.15  |  |  |  |  |  |  |  |  |            |            |
| VPT-Deep [21]    | 84.1      | 88.9       | 70.8    | 98.8       | 90.0 | 89.0 | 55.9   | 82.5 | 82.5     | 96.6    | 82.6     | 73.9        | 83.9        | 63.7        | 60.7       | 46.1  | 75.7       | 83.7      | 47.4      | 18.9       | 36.9      | 54.1 | 70.8     | 0.49  |  |  |  |  |  |  |  |  |            |            |
| LoRA [1]         | 75.8      | 89.8       | 73.6    | 99.1       | 90.8 | 83.2 | 57.5   | 81.4 | 86.0     | 95.0    | 83.4     | 75.5        | 85.0        | 78.1        | 60.5       | 46.7  | 81.6       | 76.7      | 51.3      | 28.0       | 35.4      | 57.3 | 72.0     | 0.74  |  |  |  |  |  |  |  |  |            |            |
| ARC [3]          | 76.2      | 89.6       | 73.4    | 99.1       | 90.3 | 90.9 | 56.5   | 82.3 | 85.0     | 95.7    | 83.9     | 75.8        | 85.6        | 78.6        | 62.1       | 46.7  | 76.7       | 75.9      | 53.0      | 30.2       | 35.2      | 57.3 | 72.5     | 0.18  |  |  |  |  |  |  |  |  |            |            |
| SF [22]          | 73.5      | 91.3       | 70.0    | 99.3       | 91.3 | 90.6 | 57.5   | 81.9 | 85.9     | 94.9    | 85.5     | 74.4        | 85.2        | 80.6        | 60.0       | 53.3  | 80.0       | 77.6      | 54.0      | 31.8       | 35.0      | 59.0 | 73.0     | 0.60  |  |  |  |  |  |  |  |  |            |            |
| RLRR [26]        | 79.3      | 92.0       | 74.6    | 99.5       | 92.1 | 89.6 | 60.1   | 83.9 | 87.3     | 95.3    | 87.3     | 75.7        | 86.4        | 82.7        | 62.1       | 54.6  | 80.6       | 87.1      | 54.7      | 31.3       | 41.9      | 61.9 | 75.2     | 0.82  |  |  |  |  |  |  |  |  |            |            |
| HTA              | 80.8      | 92.4       | 76.1    | 99.5       | 92.8 | 87.2 | 59.9   | 84.1 | 87.7     | 95.5    | 86.8     | 76.5        | 86.6        | 82.6        | 62.4       | 53.4  | 80.0       | 87.1      | 53.7      | 33.4       | 45.6      | 62.3 | 75.4     | 0.54  |  |  |  |  |  |  |  |  |            |            |

performance and efficiency but also promotes environmental sustainability by embracing sustainable development principles.

Ethical Aspects: Our model utilizes the vast capabilities of large-scale pre-trained models for representation and generalization. However, it is trained on datasets that might contain problematic data, such as illegal content or inherent biases, which our model could inadvertently learn. To tackle this challenge, addressing model toxicity becomes critical. Consequently, it's imperative to develop

Table 5: This table is extended from Table 4 in Section 4 and describes the detailed experimental results of the performance comparison on VTAB-1k using Swin-Base pre-trained on ImageNet-21k as the backbone.

| Methods          | Datasets    |             | Natural     |             |             |             |             |             |             | Specialized |             |             |             |             | Structed    |             |             |             |             |             |             |             |             |       | Mean Total | Params(M) |
|------------------|-------------|-------------|-------------|-------------|-------------|-------------|-------------|-------------|-------------|-------------|-------------|-------------|-------------|-------------|-------------|-------------|-------------|-------------|-------------|-------------|-------------|-------------|-------------|-------|------------|-----------|
|                  | CIFAR-100   | Caltech101  | DTD         | Flowers102  | Pets        | SVNH        | Sun397      | Mean        | Camelyon    | EuroSAT     | Resisc45    | Retinopathy | Mean        | Clevr-Count | Clevr-Dist  | DMLab       | KITTI-Dist  | dSpre-Loc   | dSpre-Ori   | sNOBB-Azim  | sNOBB-Ele   | Mean        |             |       |            |           |
| Full fine-tuning | 72.2        | 88.0        | 71.4        | 98.3        | 89.5        | 89.4        | 45.1        | 79.1        | 86.6        | <b>96.9</b> | <b>87.7</b> | 73.6        | 86.2        | 75.7        | 59.8        | 54.6        | 78.6        | 79.4        | 53.6        | <b>34.6</b> | <b>40.9</b> | 59.7        | 72.4        | 86.9  |            |           |
| Linear probing   | 61.4        | 90.2        | 74.8        | 95.5        | 90.2        | 46.9        | <b>55.8</b> | 73.5        | 81.5        | 90.1        | 82.1        | 69.4        | 80.8        | 39.1        | 35.9        | 40.1        | 65.0        | 20.3        | 26.0        | 14.3        | 27.6        | 33.5        | 58.2        | 0.05  |            |           |
| MLP-4 [21]       | 54.9        | 87.4        | 71.4        | 99.5        | 89.1        | 39.7        | 52.5        | 70.6        | 80.5        | 90.9        | 76.8        | 74.4        | 80.7        | 60.9        | 38.8        | 40.2        | 66.5        | 9.4         | 21.1        | 14.5        | 28.8        | 31.2        | 57.7        | 4.04  |            |           |
| Partial [21]     | 60.3        | 88.9        | 72.6        | 98.7        | 89.3        | 50.5        | 51.5        | 73.1        | 82.8        | 91.7        | 80.1        | 72.3        | 81.7        | 34.3        | 35.5        | 43.2        | 77.1        | 15.8        | 26.2        | 19.1        | 28.4        | 35.0        | 58.9        | 12.65 |            |           |
| Bias [20]        | 73.1        | 86.8        | 65.7        | 97.7        | 87.5        | 56.4        | 52.3        | 74.2        | 80.4        | 91.6        | 76.1        | 72.5        | 80.1        | 47.3        | 48.5        | 34.7        | 66.3        | 57.6        | 36.2        | 17.2        | 31.6        | 42.4        | 62.1        | 0.25  |            |           |
| VPT-Shallow [21] | 78.0        | <b>91.3</b> | 77.2        | 99.4        | 90.4        | 68.4        | 54.3        | 79.9        | 80.1        | 93.9        | 83.0        | 72.7        | 82.5        | 40.8        | 43.9        | 34.1        | 63.2        | 28.4        | 44.5        | 21.5        | 26.3        | 37.8        | 62.9        | 0.05  |            |           |
| VPT-Deep [21]    | <b>79.6</b> | 90.8        | <b>78.0</b> | <b>99.5</b> | 91.4        | 46.5        | 51.7        | 76.8        | 84.9        | 96.2        | 85.0        | 72.0        | 84.5        | 67.6        | 59.4        | 50.1        | 74.1        | 74.4        | 50.6        | 25.7        | 25.7        | 53.4        | 67.7        | 0.22  |            |           |
| ARC [3]          | 62.5        | 90.0        | 71.9        | 99.2        | 87.8        | 90.7        | 51.1        | 79.0        | <b>89.1</b> | <b>95.8</b> | 84.5        | <b>77.0</b> | <b>86.6</b> | 75.4        | 57.4        | 53.4        | 83.1        | <b>91.7</b> | <b>55.2</b> | 31.6        | 31.8        | 59.9        | 72.6        | 0.27  |            |           |
| RLRR [26]        | 66.1        | 90.6        | 75.5        | 99.3        | <b>92.1</b> | <b>90.9</b> | 54.7        | <b>81.3</b> | <b>87.1</b> | 95.9        | 87.1        | <b>76.5</b> | <b>86.7</b> | 66.0        | 57.8        | <b>55.3</b> | <b>84.1</b> | <b>91.1</b> | <b>55.2</b> | 28.6        | 34.0        | 59.0        | <b>73.0</b> | 0.41  |            |           |
| HTA              | 72.0        | 89.6        | 76.4        | <b>99.5</b> | <b>92.1</b> | 87.8        | <b>55.5</b> | <b>81.8</b> | 86.7        | <b>96.3</b> | <b>87.5</b> | 76.3        | <b>86.7</b> | <b>85.0</b> | <b>62.2</b> | 53.7        | <b>84.3</b> | 89.1        | 52.4        | 27.6        | <b>36.4</b> | <b>61.3</b> | <b>74.2</b> | 0.23  |            |           |

Table 6: This table is extended from Table 5 in Section 4. LoRA and Adapter both follow the configurations from the A paper. In our implementation, the fully connected layers within the bottlenecks are replaced with Householder transformations. "(.)" indicates specific configuration information

| Methods                             | Datasets  |            |      |            |      |      |        |      | Specialized |         |          |             |      |             |            |       |            |           |           |            | Structured |       |      |      |  |  |  |  | Mean Total | Params(M) |
|-------------------------------------|-----------|------------|------|------------|------|------|--------|------|-------------|---------|----------|-------------|------|-------------|------------|-------|------------|-----------|-----------|------------|------------|-------|------|------|--|--|--|--|------------|-----------|
|                                     | CIFAR-100 | Caltech101 | DTD  | Flowers102 | Pets | SVNH | Sun397 | Mean | Camelyon    | EuroSAT | Resisc45 | Retinopathy | Mean | Clevr-Count | Clevr-Dist | DMLab | KITTI-Dist | dSpre-Loc | dSpre-Ori | sNORE-Azim | sNORE-Ele  | Mean  |      |      |  |  |  |  |            |           |
| LORA( $W_q, W_v$ )                  | 67.1      | 91.4       | 69.4 | 98.8       | 90.4 | 85.3 | 54.0   | 79.5 | 84.9        | 95.3    | 84.4     | 73.6        | 84.6 | 82.9        | 69.2       | 49.8  | 78.5       | 75.7      | 47.1      | 31.0       | 44.0       | 59.8  | 72.3 | 0.29 |  |  |  |  |            |           |
| HTA( $W_q, W_v$ )                   | 71.2      | 93.3       | 72.5 | 99.3       | 91.2 | 82.7 | 56.6   | 81.0 | 85.3        | 94.9    | 82.5     | 75.7        | 84.6 | 80.8        | 62.9       | 50.2  | 78.9       | 77.4      | 51.1      | 29.7       | 45.4       | 59.6  | 72.7 | 0.09 |  |  |  |  |            |           |
| HTA( $W_q, W_v, W_{FC1}, W_{FC2}$ ) | 71.7      | 93.1       | 70.9 | 99.2       | 90.5 | 86.6 | 55.8   | 81.1 | 87.6        | 96.3    | 85.1     | 76.2        | 86.3 | 80.8        | 60.1       | 51.0  | 82.0       | 86.9      | 52.2      | 32.9       | 46.0       | 61.48 | 73.9 | 0.28 |  |  |  |  |            |           |
| Adapter( $W_{FC1}, W_{FC2}$ )       | 69.2      | 90.1       | 68.0 | 98.8       | 89.9 | 82.8 | 54.3   | 79.0 | 84.0        | 94.9    | 81.9     | 75.5        | 84.1 | 80.9        | 65.3       | 48.6  | 78.3       | 74.8      | 48.5      | 29.9       | 41.6       | 58.5  | 71.4 | 0.16 |  |  |  |  |            |           |
| HTA( $W_{FC1}, W_{FC2}$ )           | 72.6      | 93.0       | 71.1 | 99.3       | 91.4 | 82.1 | 57.2   | 81.0 | 85.3        | 95.0    | 82.9     | 76.3        | 84.9 | 81.6        | 63.9       | 49.5  | 81.2       | 79.2      | 51.4      | 28.1       | 45.4       | 60.0  | 73.0 | 0.05 |  |  |  |  |            |           |

Table 7: This table is extended from Fig. 2 in Section 4.

| Methods | Datasets  |            | Natural |            |      |      |        |      |          |         | Specialized |             |      |             |            | Structured |            |          |          |            |           |      |      |      |  | Mean Total | Params.(M) |
|---------|-----------|------------|---------|------------|------|------|--------|------|----------|---------|-------------|-------------|------|-------------|------------|------------|------------|----------|----------|------------|-----------|------|------|------|--|------------|------------|
|         | CIFAR-100 | Caltech101 | DTD     | Flowers102 | Pets | SVNH | Sun397 | Mean | Camelyon | EuroSAT | Resisc45    | Retinopathy | Mean | Clevr-Count | Clevr-Dist | DMLab      | KITTI-Dist | dSPr-Loc | dSPr-Ori | sNOBB-Azim | sNOBB-Ele | Mean |      |      |  |            |            |
| $D'=0$  | 73.0      | 90.1       | 71.8    | 99.3       | 91.1 | 83.4 | 53.7   | 80.3 | 82.3     | 94.2    | 82.7        | 73.7        | 83.2 | 77.3        | 61.6       | 49.2       | 80.0       | 81.7     | 53.3     | 28.1       | 41.2      | 59.1 | 72.0 | 0.15 |  |            |            |
| $D'=1$  | 76.6      | 94.3       | 72.5    | 99.3       | 91.3 | 86.2 | 56.5   | 82.4 | 87.6     | 95.7    | 85.0        | 75.7        | 86.0 | 82.6        | 63.3       | 52.5       | 81.0       | 84.5     | 52.6     | 34.5       | 47.3      | 62.3 | 74.7 | 0.22 |  |            |            |
| $D'=2$  | 75.5      | 94.2       | 73.0    | 99.3       | 91.2 | 85.7 | 56.3   | 82.2 | 88.0     | 95.2    | 84.6        | 76.1        | 86.0 | 82.2        | 63.1       | 52.1       | 80.2       | 85.5     | 52.3     | 33.9       | 47.5      | 62.1 | 74.5 | 0.30 |  |            |            |
| $D'=4$  | 74.6      | 93.6       | 72.1    | 99.3       | 91.4 | 88.3 | 56.1   | 82.2 | 88.0     | 96.3    | 85.6        | 76.4        | 86.6 | 81.8        | 64.9       | 53.6       | 82.3       | 84.8     | 53.6     | 34.4       | 47.2      | 62.8 | 75.0 | 0.44 |  |            |            |

enhanced mechanisms that can both identify and reduce such biases and unlawful information in the datasets.
